# Supplementary material
Source: publisher figshare collection journal article supplement (https://aacr.figshare.com/articles/dataset/_/22383807)
Supplement: Supplementary file 1 [file 39829224]

**Supplemental Table 1: Characteristics and clinical features of serum samples. ALT, alanine aminotransferase; AST, aspartate aminotransferase.**

| <b>Group* (Case number)</b>                         | <b>Age <math>\pm</math> SD (Year)</b> | <b>Gender</b>          | <b>ALT <math>\pm</math> SD (IU/L)</b>    | <b>AST <math>\pm</math> SD(IU/L)</b>    |
|-----------------------------------------------------|---------------------------------------|------------------------|------------------------------------------|-----------------------------------------|
| <b>Group A:</b><br>Normal control (160)             | 37.52 $\pm$ 12.09<br>range:20-75      | female: 75<br>male: 85 | 19.15 $\pm$ 7.53<br>range:5.1-37.6       | 21.81 $\pm$ 6.19<br>range:11.6-33.6     |
| <b>Group B:</b><br>Asymptomatic<br>HBV carrier (55) | 35.80 $\pm$ 11.40<br>range:21-67      | female: 22<br>male: 33 | 24.76 $\pm$ 7.43<br>range:10.7-39.0      | 20.88 $\pm$ 4.45<br>range:11.8-38.3     |
| <b>Group C:</b><br>Chronic hepatitis B (80)         | 36.22 $\pm$ 12.18<br>range:20-86      | female: 25<br>male: 55 | 261.68 $\pm$ 209.89<br>range:81.2-1602.3 | 205.10 $\pm$ 142.47<br>range:82.3-877.5 |
| <b>Group D:</b><br>HBV-positive HCC (65)            | 53.43 $\pm$ 9.10<br>range:40-83       | female: 6<br>male: 59  | —                                        | —                                       |
| <b>Group E:</b><br>Chronic hepatitis C (48)         | 35.96 $\pm$ 7.15<br>range:24-58       | female: 9<br>male: 39  | —                                        | —                                       |
| <b>Group F:</b><br>HBV-positive HCC (55)            | 52.83 $\pm$ 7.85<br>range:42-70       | female: 9<br>male: 46  | —                                        | —                                       |
| <b>Group G:</b><br>HCC-free control (50)            | 47.72 $\pm$ 12.09<br>range: 36-72     | female: 8<br>male: 42  | 27.3 $\pm$ 11.29<br>range:6.6-34.6       | 26.72 $\pm$ 6.57<br>range:10.2-39.1     |

**\*Group inclusion criteria:**

Group A: anti-HBs, HBsAg and HBc negative; anti-HCV and/or HCV RNA negative; No other systematic disease.

Group B: HBsAg and anti-HBc positive; anti-HCV and/or HCV RNA negative; No clinical symptoms of hepatitis; No clinical evidence of liver cirrhosis; No other systematic disease.

Group C: HBsAg and anti-HBc positive for at least 6 months; anti-HCV and/or HCV RNA negative; No clinical evidence of liver cirrhosis; No other systematic disease.

Group D and F: HBsAg and anti-HBc positive; anti-HCV and/or HCV RNA negative; HCC confirmed by biopsy; No clinical evidence of liver cirrhosis.

Group E: anti-HCV and/or HCV RNA positive; HBsAg negative; No clinical evidence of liver cirrhosis; No other systematic disease.

Group G: anti-HBs, HBsAg and HBc negative; anti-HCV and/or HCV RNA negative; No HCC confirmed by biopsy; No clinical evidence of liver cirrhosis.

**Supplemental Table 2.** Solexa sequencing results for a pooled serum sample from 30 normal controls or 30 pooled chronic hepatitis B patients. The results are normalized against spiked-in plant miRNA-168.

| miRNA          | Control | HBV   | miRNA          | Control | HBV |
|----------------|---------|-------|----------------|---------|-----|
| hsa-miR-122a   | 1       | 69501 | hsa-miR-151    | 40      | 16  |
| hsa-miR-423    | 40      | 5741  | hsa-miR-92b    | 0       | 16  |
| hsa-miR-92a    | 68      | 3356  | hsa-miR-142    | 110     | 14  |
| hsa-miR-451    | 11660   | 2194  | hsa-miR-486-3p | 0       | 14  |
| hsa-let-7c     | 3       | 1073  | hsa-miR-455-3p | 0       | 11  |
| hsa-miR-23a    | 3       | 530   | hsa-miR-101    | 502     | 9   |
| hsa-miR-16     | 1361    | 377   | hsa-miR-30a    | 0       | 9   |
| hsa-let-7f     | 402     | 250   | hsa-miR-197    | 0       | 9   |
| hsa-let-7g     | 412     | 205   | hsa-miR-574-3p | 0       | 9   |
| hsa-miR-23b    | 1       | 202   | hsa-miR-532    | 6       | 7   |
| hsa-miR-223    | 8       | 168   | hsa-miR-923    | 6       | 7   |
| hsa-miR-342-3p | 1       | 152   | hsa-miR-365    | 0       | 7   |
| hsa-miR-375    | 0       | 148   | hsa-miR-7      | 95      | 5   |
| hsa-miR-99a    | 0       | 127   | hsa-miR-106a   | 32      | 5   |
| hsa-miR-150    | 2       | 120   | hsa-miR-30e    | 16      | 5   |
| hsa-miR-21     | 187     | 102   | hsa-miR-652    | 9       | 5   |
| hsa-miR-103    | 201     | 91    | hsa-miR-148b   | 7       | 5   |
| hsa-miR-191    | 127     | 91    | hsa-miR-106b   | 280     | 2   |
| hsa-miR-221    | 1       | 89    | hsa-miR-186    | 68      | 2   |
| hsa-miR-125b   | 1       | 89    | hsa-miR-142-3p | 65      | 2   |
| hsa-let-7i     | 215     | 86    | hsa-miR-363    | 62      | 2   |
| hsa-miR-93     | 102     | 70    | hsa-miR-130a   | 23      | 2   |
| hsa-miR-185    | 370     | 61    | hsa-miR-29c    | 21      | 2   |
| hsa-miR-378    | 34      | 61    | hsa-miR-20b    | 20      | 2   |
| hsa-miR-629    | 1       | 59    | hsa-miR-130b   | 12      | 2   |
| hsa-miR-222    | 3       | 57    | hsa-miR-146b   | 9       | 2   |
| hsa-miR-10a    | 1       | 52    | hsa-miR-374a   | 8       | 2   |
| hsa-miR-885    | 0       | 48    | hsa-miR-660    | 6       | 2   |
| hsa-miR-99b    | 0       | 48    | hsa-miR-424    | 5       | 2   |
| hsa-miR-193b   | 0       | 43    | hsa-miR-532-3p | 1       | 2   |
| hsa-miR-27b    | 2       | 41    | hsa-miR-193a   | 0       | 2   |
| hsa-miR-15a    | 93      | 39    | hsa-miR-20a    | 297     | 0   |
| hsa-miR-26a    | 110     | 36    | hsa-miR-19b    | 97      | 0   |
| hsa-miR-107    | 109     | 34    | hsa-miR-144    | 64      | 0   |
| hsa-miR-27a    | 0       | 34    | hsa-miR-18a    | 24      | 0   |
| hsa-miR-128a   | 2       | 25    | hsa-miR-340    | 22      | 0   |
| hsa-miR-483-3p | 0       | 25    | hsa-miR-182    | 16      | 0   |
| hsa-miR-483    | 0       | 25    | hsa-miR-98     | 13      | 0   |
| hsa-miR-139    | 0       | 23    | hsa-miR-183    | 7       | 0   |
| hsa-miR-17     | 111     | 20    | hsa-miR-126    | 7       | 0   |
| hsa-miR-128b   | 2       | 20    | hsa-miR-210    | 6       | 0   |
| hsa-miR-1      | 1       | 20    | hsa-miR-362    | 5       | 0   |
| hsa-miR-146a   | 22      | 18    | hsa-miR-96     | 5       | 0   |
| hsa-miR-26b    | 57      | 16    | hsa-miR-454    | 4       | 0   |

**Supplemental Table 3. Fold changes of 13 miRNAs between persistent asymptomatic HBV carriers and chronic hepatitis B cases.**

| miRNA      | Sample/No                     | Mean Fold $\pm$ S.D. | P    |
|------------|-------------------------------|----------------------|------|
| miR-375    | Asymptomatic HBV carriers /55 | 1.00 $\pm$ 1.00      | Ref. |
|            | Chronic hepatitis B /80       | 0.89 $\pm$ 0.56      | 0.36 |
| miR-92a    | Asymptomatic HBV carriers /55 | 1.00 $\pm$ 0.98      | Ref. |
|            | Chronic hepatitis B /80       | 0.96 $\pm$ 0.53      | 0.72 |
| miR-10a    | Asymptomatic HBV carriers /55 | 1.00 $\pm$ 0.64      | Ref. |
|            | Chronic hepatitis B/80        | 0.90 $\pm$ 0.55      | 0.28 |
| miR-223    | Asymptomatic HBV carriers /55 | 1.00 $\pm$ 0.43      | Ref. |
|            | Chronic hepatitis B /80       | 0.97 $\pm$ 0.30      | 0.56 |
| miR-423    | Asymptomatic HBV carriers /55 | 1.00 $\pm$ 2.51      | Ref. |
|            | Chronic hepatitis B/80        | 0.34 $\pm$ 0.52      | 0.06 |
| miR-23b    | Asymptomatic HBV carriers /55 | 1.00 $\pm$ 1.38      | Ref. |
|            | Chronic hepatitis B/80        | 0.91 $\pm$ 0.90      | 0.59 |
| miR-23a    | Asymptomatic HBV carriers /55 | 1.00 $\pm$ 3.90      | Ref. |
|            | Chronic hepatitis B/80        | 0.56 $\pm$ 1.05      | 0.32 |
| miR-342-3p | Asymptomatic HBV carriers /55 | 1.00 $\pm$ 0.87      | Ref. |
|            | Chronic hepatitis B /80       | 1.15 $\pm$ 0.69      | 0.22 |
| miR-99a    | Asymptomatic HBV carriers /55 | 1.00 $\pm$ 0.85      | Ref. |
|            | Chronic hepatitis B /80       | 0.92 $\pm$ 0.45      | 0.42 |
| miR-122a   | Asymptomatic HBV carriers /55 | 1.00 $\pm$ 0.96      | Ref. |
|            | Chronic hepatitis B /80       | 0.98 $\pm$ 0.70      | 0.85 |
| miR-125b   | Asymptomatic HBV carriers /55 | 1.00 $\pm$ 1.39      | Ref. |
|            | Chronic hepatitis B /80       | 1.02 $\pm$ 0.72      | 0.93 |
| miR-150    | Asymptomatic HBV carriers /55 | 1.00 $\pm$ 3.66      | Ref. |
|            | Chronic hepatitis B /80       | 0.63 $\pm$ 0.83      | 0.36 |
| Let-7c     | Asymptomatic HBV carriers /55 | 1.00 $\pm$ 0.74      | Ref. |
|            | Chronic hepatitis B/80        | 0.71 $\pm$ 0.47      | 0.05 |

**Supplemental Table 4. C<sub>T</sub> value and fold changes of the 13 miRNAs between the 4 serum groups.**

| miRNA      | Sample/No           | Mean CT±S.D. | Mean Fold±S.D. | P*                     | P*                       |
|------------|---------------------|--------------|----------------|------------------------|--------------------------|
| miR-375    | Control group/160   | 20.29±1.02   | 1.00±0.78      | Ref.                   |                          |
|            | HBV group/135       | 13.03±1.30   | 176±173        | 2.33×10 <sup>-22</sup> | 6.14×10 <sup>-22 a</sup> |
|            | HCV group/48        | 18.76±1.27   | 3.45±3.86      | 6.58×10 <sup>-5</sup>  | 1.63×10 <sup>-20 b</sup> |
| miR-92a    | HBV positive HCC/65 | 16.98±1.27   | 11.6±12.4      | 2.90×10 <sup>-9</sup>  | 3.56×10 <sup>-6 c</sup>  |
|            | Control group/160   | 19.78±1.26   | 1.00±0.98      | Ref.                   |                          |
|            | HBV group/135       | 18.06±0.78   | 2.76±2.60      | 5.37×10 <sup>-12</sup> | 4.21×10 <sup>-21 a</sup> |
| miR-10a    | HCV group/48        | 15.49±0.51   | 14.6±5.26      | 8.53×10 <sup>-23</sup> | 1.21×10 <sup>-4 b</sup>  |
|            | HBV positive HCC/65 | 16.24±1.68   | 16.7±27.4      | 1.92×10 <sup>-5</sup>  | 5.48×10 <sup>-1 c</sup>  |
|            | Control group/160   | 24.01±4.78   | 1.00±1.34      | Ref.                   |                          |
| miR-223    | HBV group/135       | 14.13±0.67   | 74.2±33.0      | 8.05×10 <sup>-54</sup> | 1.96×10 <sup>-54 a</sup> |
|            | HCV group/48        | 29.22±1.33   | 0.003±0.004    | 5.38×10 <sup>-17</sup> | 2.07×10 <sup>-54 b</sup> |
|            | HBV positive HCC/65 | 25.87±1.65   | 0.04±0.09      | 5.33×10 <sup>-16</sup> | 1.53×10 <sup>-3 c</sup>  |
| miR-423    | Control group/160   | 25.59±1.06   | 1.00±0.70      | Ref.                   |                          |
|            | HBV group/135       | 22.82±0.56   | 5.74±2.13      | 2.55×10 <sup>-56</sup> | 3.46×10 <sup>-58 a</sup> |
|            | HCV group/48        | 25.78±0.81   | 0.78±0.36      | 4.30×10 <sup>-3</sup>  | 1.43×10 <sup>-18 b</sup> |
| miR-23b    | HBV positive HCC/65 | 23.93±0.93   | 2.97±1.67      | 7.96×10 <sup>-14</sup> | 1.02×10 <sup>-15 c</sup> |
|            | Control group/160   | 24.62±1.26   | 1.00±0.97      | Ref.                   |                          |
|            | HBV group/135       | 20.22±2.2    | 63.9±206       | 5.36×10 <sup>-4</sup>  | 6.45×10 <sup>-1 a</sup>  |
| miR-23a    | HCV group/48        | 19.78±1.75   | 51.8±134       | 1.16×10 <sup>-2</sup>  | 3.10×10 <sup>-1 b</sup>  |
|            | HBV positive HCC/65 | 19.22±1.38   | 44.9±46.5      | 1.56×10 <sup>-10</sup> | 7.34×10 <sup>-1 c</sup>  |
|            | Control group/160   | 34.63±2.27   | 1.00±2.34      | Ref.                   |                          |
| miR-342-3p | HBV group/135       | 29.89±1.64   | 12.7±16.5      | 1.73×10 <sup>-13</sup> | 1.13×10 <sup>-2 a</sup>  |
|            | HCV group/48        | 29.84±3.22   | 58.5±120       | 1.75×10 <sup>-3</sup>  | 1.02×10 <sup>-4 b</sup>  |
|            | HBV positive HCC/65 | 26.34±2.56   | 335±627        | 6.06×10 <sup>-5</sup>  | 8.93×10 <sup>-4 c</sup>  |
| miR-99a    | Control group/160   | 33.33±2.14   | 1.00±2.94      | Ref.                   |                          |
|            | HBV group/135       | 28.69±1.71   | 26.2±128       | 2.38×10 <sup>-2</sup>  | 9.33×10 <sup>-1 a</sup>  |
|            | HCV group/48        | 30.24±3.34   | 25.0±63.3      | 1.16×10 <sup>-2</sup>  | 1.81×10 <sup>-2 b</sup>  |
| miR-122a   | HBV positive HCC/65 | 26.26±2.78   | 262±779        | 8.83×10 <sup>-3</sup>  | 1.73×10 <sup>-2 c</sup>  |
|            | Control group/160   | 19.85±0.99   | 1.00±0.69      | Ref.                   |                          |
|            | HBV group/135       | 14.51±1.38   | 46.3±39.1      | 1.16×10 <sup>-26</sup> | 7.45×10 <sup>-26 a</sup> |
| miR-125b   | HCV group/48        | 18.77±0.96   | 2.08±1.35      | 1.88×10 <sup>-6</sup>  | 1.59×10 <sup>-20 b</sup> |
|            | HBV positive HCC/65 | 16.87±1.19   | 8.60±7.83      | 6.63×10 <sup>-11</sup> | 7.50×10 <sup>-9 c</sup>  |
|            | Control group/160   | 28.69±1.69   | 1.00±3.54      | Ref.                   |                          |
| miR-150    | HBV group/135       | 24.51±1.03   | 8.04±6.65      | 2.20×10 <sup>-22</sup> | 1.6×10 <sup>-8 a</sup>   |
|            | HCV group/48        | 27.84±1.64   | 1.93±5.62      | 2.83×10 <sup>-1</sup>  | 1.74×10 <sup>-1 b</sup>  |
|            | HBV positive HCC/65 | 24.78±1.7    | 13.7±32.9      | 2.83×10 <sup>-3</sup>  | 6.11×10 <sup>-3 c</sup>  |
| Let7c      | Control group/160   | 36.62±2.34   | 1.00±1.94      | Ref.                   |                          |
|            | HBV group/135       | 29.27±1.49   | 71.6±68.4      | 5.79×10 <sup>-23</sup> | 2.42×10 <sup>-23 a</sup> |
|            | HCV group/48        | 38.63±1.28   | 0.12±0.17      | 6.29×10 <sup>-8</sup>  | 1.37×10 <sup>-21 b</sup> |
| miR-125b   | HBV positive HCC/65 | 34.04±2.05   | 4.09±5.38      | 2.48×10 <sup>-5</sup>  | 1.25×10 <sup>-7 c</sup>  |
|            | Control group/160   | 26.95±3.33   | 1.00±2.22      | Ref.                   |                          |
|            | HBV group/135       | 20.92±1.13   | 12.5±11.9      | 6.54×10 <sup>-21</sup> | 3.15×10 <sup>-23 a</sup> |
| miR-125b   | HCV group/48        | 28.19±1.43   | 0.11±0.19      | 1.38×10 <sup>-6</sup>  | 7.50×10 <sup>-23 b</sup> |
|            | HBV positive HCC/65 | 27.03±1.51   | 0.26±0.46      | 8.74×10 <sup>-5</sup>  | 1.99×10 <sup>-2 c</sup>  |
|            | Control group/160   | 32.02±2.09   | 1.00±2.24      | Ref.                   |                          |
| miR-150    | HBV group/135       | 29.13±2.24   | 12.4±53.8      | 1.52×10 <sup>-2</sup>  | 5.52×10 <sup>-1 a</sup>  |
|            | HCV group/48        | 30.30±2.31   | 8.56±31.1      | 9.90×10 <sup>-2</sup>  | 1.48×10 <sup>-1 b</sup>  |
|            | HBV positive HCC/65 | 27.57±2.16   | 22.3±40.2      | 6.61×10 <sup>-5</sup>  | 4.29×10 <sup>-2 c</sup>  |
| Let7c      | Control group/160   | 19.63±1.85   | 1.00±1.20      | Ref.                   |                          |
|            | HBV group/135       | 17.02±1.20   | 4.13±3.34      | 1.37×10 <sup>-19</sup> | 1.06×10 <sup>-21 a</sup> |
|            | HCV group/48        | 19.08±0.66   | 0.81±0.37      | 8.24×10 <sup>-2</sup>  | 6.30×10 <sup>-3 b</sup>  |
|            | HBV positive HCC/65 | 16.58±1.43   | 5.99±4.84      | 9.83×10 <sup>-12</sup> | 2.57×10 <sup>-12 c</sup> |

\* All P values are calculated by Student *t* test.

a “HBV group” vs “Chronic hepatitis C patients”

b “HBV group” vs “HBV positive HCC”

c “Chronic hepatitis C patients” vs “HBV positive HCC”

**Supplemental Table 5. Fold changes of the six serum miRNAs between the HBV-positive HCC and the age-, gender-matched control groups.**

| <b>miRNA</b>   | <b>Sample/No.</b> | <b>Mean Fold ± S.D.</b> | <b>P*</b>              |
|----------------|-------------------|-------------------------|------------------------|
| miR-1          | Control/50        | 1.00±1.37               | Ref.                   |
|                | HCC/55            | 3.52±2.66               | 1.37×10 <sup>-11</sup> |
| let-7f         | Control/50        | 1.00±1.21               | Ref.                   |
|                | HCC/55            | 253.60±419.09           | 1.54×10 <sup>-17</sup> |
| miR-25         | Control/50        | 1.00±1.61               | Ref.                   |
|                | HCC/55            | 116.41±166.64           | 8.16×10 <sup>-13</sup> |
| <u>miR-92a</u> | Control/50        | 1.00±1.83               | Ref.                   |
|                | HCC/55            | 4.97±7.91               | 1.60×10 <sup>-10</sup> |
| miR-206        | Control/50        | 1.00±2.40               | Ref.                   |
|                | HCC/55            | 2.98±3.94               | 8.36×10 <sup>-8</sup>  |
| <u>miR-375</u> | Control/50        | 1.00±0.17               | Ref.                   |
|                | HCC/55            | 3.97±0.96               | 1.16×10 <sup>-17</sup> |

\* All *P* values are calculated by Wilcoxon rank-sum (Mann-Whitney) test.

**Supplemental Table 6.** Solexa sequencing results from serum samples pooled from 25 cirrhosis cases, 25 HBV-positive HCC cases or 25 health controls. Total copies sequenced in three groups: control, 946774; cirrhosis, 614273; HCC, 431633. The final copy number of each miRNA was normalized against total copy number.

| <b>miRNA No.</b> | <b>control</b> | <b>cirrhosis</b> | <b>HCC</b> |
|------------------|----------------|------------------|------------|
| miR-34c-5p       | 154            | 3059             | 79         |
| miR-1301         | 0              | 464              | 0          |
| miR-17           | 21             | 368              | 0          |
| miR-204          | 0              | 211              | 0          |
| miR-320c         | 0              | 570              | 0          |
| miR-99a          | 864            | 5197             | 1625       |
| miR-21           | 6              | 281              | 0          |
| miR-22           | 0              | 277              | 0          |
| miR-217          | 0              | 217              | 0          |
| miR-449a         | 0              | 156              | 0          |
| miR-455-5p       | 0              | 234              | 0          |
| miR-199a-5p      | 0              | 165              | 0          |
| miR-186          | 256            | 1071             | 0          |
| miR-421          | 0              | 214              | 0          |
| miR-411          | 0              | 208              | 0          |
| miR-720          | 0              | 123              | 0          |
| miR-135a         | 314            | 3254             | 870        |
| miR-653          | 0              | 350              | 0          |
| miR-514          | 0              | 538              | 0          |
| miR-886-3p       | 0              | 126              | 0          |

**Supplemental Table 7.** Verified or predicted probable targets of the studied miRNAs that might be involved in the initiation and development of HBV-positive HCC.

| <b>miRNAs</b> | <b>Genes</b> | <b>Full name/Alternative titles</b>                           | <b>P value *</b>        |
|---------------|--------------|---------------------------------------------------------------|-------------------------|
| miR-375       | JAK2         | Janus Kinase 2                                                | Krek et al, 2005        |
|               | C1QBP        | Complement Component C1q-binding Protein                      | Krek et al, 2005        |
|               | TP53         | Tumor Protein p53                                             | 4.06×10 <sup>-4</sup>   |
| miR-92a       | FAN          | Factor Associated with N-SMase Activation                     | 2.46×10 <sup>-11</sup>  |
|               | DKK3         | Dickkopf, <i>Xenopus</i> , Homolog of 3                       | 3.36×10 <sup>-9</sup>   |
|               | NOX4         | NADPH Oxidase 4                                               | 1.40×10 <sup>-6</sup>   |
|               | AURKA        | Aurora Kinase A                                               | 1.42×10 <sup>-5</sup>   |
| miR-23a       | CXCL12       | Chemokine CXC Motif, Ligand 12                                | Lewis et al, 2003       |
| miR-23b       | NOTCH1       | Notch, <i>Drosophila</i> , Homolog of, 1                      | Fukuda et al, 2005      |
|               | PTP4A2       | Protein-Tyrosine Phosphatase, Type 4A, 2                      | 1.42×10 <sup>-6</sup>   |
| miR-10a       | HOXA1        | Homeobox A1                                                   | Garzon et al, 2006      |
|               | GATA6        | GATA-Binding Protein 6                                        | 7.01×10 <sup>-6</sup>   |
|               | TBP          | TATA Box-Binding Protein                                      | 2.03×10 <sup>-5</sup>   |
| mir-125b      | Lin28        | Lin28, <i>C. Elegans</i> , Homolog of                         | Wu et al, 2005          |
|               | BAK1         | BCL2 Antagonist Killer 1                                      | 6.34×10 <sup>-5</sup>   |
|               | TNF          | Tumor Necrosis Factor                                         | 2.49×10 <sup>-4</sup>   |
| mir-122a      | CCNG1        | Cyclin G1                                                     | Gramantieri et al, 2007 |
|               | IGFBP1       | Insulin-like Growth Factor-Binding Protein 1                  | 1.66×10 <sup>-5</sup>   |
|               | MET          | MET Protooncogene                                             | 1.62×10 <sup>-4</sup>   |
|               | WNT1         | Wingless-Type MMTV Integration Site Family 1                  | 1.93×10 <sup>-4</sup>   |
|               | PLA2G7       | Phospholipase A2, Group VII                                   | 2.33×10 <sup>-4</sup>   |
| miR-223       | STMN1        | Stathmin 1                                                    | Wong et al, 2008        |
| miR-423       | SHIP2        | SH2-Containing Inositol Phosphatase 2                         | 8.50×10 <sup>-5</sup>   |
|               | IGFBP2       | Insulin-like Growth Factor-Binding Protein 2                  | 1.52×10 <sup>-4</sup>   |
| miR-342-3p    | TENC1        | Tensin-like C1 Domain-Containing Phosphatase                  | 9.88×10 <sup>-5</sup>   |
| miR-99a       | MTOR         | Mammalian Target of Rapamycin                                 | 6.34×10 <sup>-6</sup>   |
|               | RELB         | V-Rel Avian Reticuloendotheliosis Viral Oncogene<br>Homolog B | 1.74×10 <sup>-4</sup>   |
|               | FGF4         | Fibroblast Growth Factor 4                                    | 2.32×10 <sup>-4</sup>   |
| Let7c         | MYC          | V-MYC Avian Myelocytomatosis Viral Oncogene<br>Homolog        | 7.35×10 <sup>-8</sup>   |
| miR-150       | IGFBP2       | Insulin-like Growth Factor-Binding Protein 2                  | 4.55×10 <sup>-6</sup>   |

\* The best *P* value of the selected miRNA for the transcript or reference.

**Supplemental references:**

1. Krek A, Grün D, Poy MN, Wolf R, Rosenberg L, Epstein EJ, MacMenamin P, da Piedade I, Gunsalus KC, Stoffel M, Rajewsky N. Combinatorial microRNA target predictions. *Nat Genet.* 2005 May;37(5):495-500.
2. Lewis BP, Shih IH, Jones-Rhoades MW, Bartel DP, Burge CB. Prediction of mammalian microRNA targets. *Cell.* 2003 Dec 26;115(7):787-98.
3. Fukuda Y, Kawasaki H, Taira K. Exploration of human miRNA target genes in neuronal differentiation. *Nucleic Acids Symp Ser (Oxf).* 2005;(49):341-2.
4. Garzon R, Pichiorri F, Palumbo T, Iuliano R, Cimmino A, Aqeilan R, Volinia S, Bhatt D, Alder H, Marcucci G, Calin GA, Liu CG, Bloomfield CD, Andreeff M, Croce CM. MicroRNA fingerprints during human megakaryocytopoiesis. *Proc Natl Acad Sci U S A.* 2006 Mar 28;103(13):5078-83.
5. Wu L, Belasco JG. Micro-RNA regulation of the mammalian lin-28 gene during neuronal differentiation of embryonal carcinoma cells. *Mol Cell Biol.* 2005 Nov;25(21):9198-208.
6. Gramantieri L, Ferracin M, Fornari F, Veronese A, Sabbioni S, Liu CG, Calin GA, Giovannini C, Ferrazzi E, Grazi GL, Croce CM, Bolondi L, Negrini M. Cyclin G1 is a target of miR-122a, a microRNA frequently down-regulated in human hepatocellular carcinoma. *Cancer Res.* 2007 Jul 1;67(13):6092-9.
7. Wong QW, Lung RW, Law PT, Lai PB, Chan KY, To KF, Wong N. MicroRNA-223 is commonly repressed in hepatocellular carcinoma and potentiates expression of Stathmin1. *Gastroenterology.* 2008 Jul;135(1):257-69.
